# **The sequence of a male-specific genome region containing the sex determination switch in *Aedes aegypti***

3

4 Joe Turner <sup>1,2¶</sup>, Ritesh Krishna <sup>1#a¶</sup>, Arjen E. van't Hof <sup>1#b¶</sup>, Elizabeth R. Sutton <sup>2,3#c</sup>, Kelly  
5 Matzen <sup>2</sup>, Alistair C. Darby <sup>1\*</sup>

6

7

8 1. Centre for Genomic Research, Institute of Integrative Biology, University of Liverpool,  
9 Crown Street, Liverpool, L69 7ZB, UK.

10 2. Oxitec Ltd., 71 Innovation Drive, Milton Park, Abingdon, OX14 4RQ, UK.

11 3. Department of Zoology, University of Oxford, South Parks Road, Oxford, OX1 3PS, UK.

12

13 Current Addresses:

14 #a IBM Research UK, STFC Daresbury Laboratory, Warrington, WA4 4AD, UK.

15 #b Liverpool School of Tropical Medicine, Pembroke Place, Liverpool, L3 5QA, UK.

16 #c Sismic, West of Scotland Science Park, Glasgow, G20 0SP, UK.

17

18 \* Corresponding author

19 acdarby@liverpool.ac.uk

20

21 ¶ Authors contributed equally to this work.

22

23 *Aedes aegypti* is the principal vector of several important arboviruses. Among the methods of  
 24 vector control to limit transmission of disease are genetic strategies that involve the release of  
 25 sterile or genetically modified non-biting males<sup>1</sup>, which has generated interest in  
 26 manipulating mosquito sex ratios<sup>2,3</sup>. Sex determination in *Ae. aegypti* is controlled by a non-  
 27 recombining Y chromosome-like region called the M locus<sup>4</sup>, yet characterisation of this locus  
 28 has been thwarted by the repetitive nature of the genome<sup>5</sup>. In 2015, an M locus gene named  
 29 *Nix* was identified that displays the qualities of a sex determination switch<sup>5</sup>. With the use of a  
 30 whole-genome BAC library, we amplified and sequenced a ~200kb region containing this  
 31 male-determining gene. In this study, we show that *Nix* is comprised of two exons separated  
 32 by a 99kb intron, making it an unusually large gene. The intron sequence is highly repetitive  
 33 and exhibits features in common with old Y chromosomes, and we speculate that the lack of  
 34 recombination at the M locus has allowed the expansion of repeats in a manner characteristic  
 35 of a sex-limited chromosome, in accordance with proposed models of sex chromosome  
 36 evolution in insects.

37

38 At least 2.5 billion people live in areas where they are at risk of dengue transmission from  
 39 mosquitoes, principally *Ae. aegypti*, with an estimated 390 million infections per year<sup>6,7</sup>.  
 40 Recently, the emergence of chikungunya and Zika viruses further highlights the public health  
 41 importance of *Ae. aegypti*<sup>8,9</sup>. Future mosquito control strategies may incorporate genetic  
 42 techniques such as the sustained release of sterile or transgenic “self-limiting” mosquitoes<sup>10</sup>  
 43 (WHO: <https://goo.gl/FRqJ0d>). Given that only female mosquitoes bite and spread disease,  
 44 there has been substantial interest in manipulating mosquito sex determination using these  
 45 genetic techniques and others, including gene drive<sup>3,11</sup>. Therefore, elucidating the genetic  
 46 basis for sex determination could, for instance, facilitate production of male-only cohorts for

47 release, or allow transformation of mosquitoes with sex-specific “self-limiting” gene  
 48 cassettes.

49 Sex determination in insects is variable, and generally not well understood outside of model  
 50 species<sup>12</sup>. Unlike the malaria mosquito *Anopheles gambiae* and *Drosophila* species, *Ae.*  
 51 *aegypti* does not have heteromorphic (XY) sex chromosomes<sup>4</sup>. Instead, the male phenotype is  
 52 determined by a non-recombining M locus on one copy of autosome 1<sup>13–15</sup>. This locus is  
 53 poorly characterised because its highly repetitive nature has confounded attempts to study it  
 54 based on the existing genome assembly<sup>5</sup>. The 1,376Mb *Ae. aegypti* genome was assembled  
 55 from Sanger sequencing reads in 2007<sup>16</sup>, which are commonly not long enough to span the  
 56 repetitive transposable elements that comprise a large proportion of the genome<sup>17</sup>.  
 57 Consequently, the current assembly is still relatively low quality<sup>18</sup>. Furthermore, the fact that  
 58 both male and female genomic DNA was used for genome sequencing reduces the expected  
 59 coverage of the M locus to one quarter of the autosome 1 sequences, further obscuring  
 60 candidate M locus sequences<sup>19</sup>.

61 Recently, a team of researchers was nevertheless able to identify *Nix*, a gene with male-  
 62 specific, early embryonic expression. Knockout of *Nix* using CRISPR/Cas9 results in  
 63 morphological feminisation of male mosquitoes along with feminisation of gene expression  
 64 and female splice forms of the conserved sex-regulating genes *doublesex* (*dsx*) and *fruitless*  
 65 (*fru*), strongly indicating that *Nix* is the upstream regulator of sexual differentiation<sup>5</sup>. The  
 66 translated *Nix* protein contains two RNA recognition motifs and is hypothesised to be a  
 67 splicing factor, acting either directly on *dsx* and *fru* or on currently unknown intermediates<sup>3</sup>.  
 68 A comparison of sexually dimorphic gene expression in different mosquito tissue types also  
 69 detected male-specific transcripts of *Nix*<sup>20</sup>. An ortholog of *Nix* is present in *Ae. albopictus*,  
 70 but it is not known if the two are functionally homologous<sup>21</sup>.

71 To date, *Nix* has only been characterised as an mRNA transcript. To fully understand this  
72 gene's role in sex determination and to utilise this knowledge for vector control, it is essential  
73 to decipher its genomic context. For this purpose, this study identifies and describes the  
74 region of the M-locus in which *Nix* is located.

75

76 Four BAC clones positive for *Nix* assembled into a single region of 207 kb with no gaps and  
77 a GC content of 40.2% (submitted to the NCBI as accession KY849907). The presence of the  
78 *Nix* gene in the assembled BACS was confirmed by BLASTN. The whole gene was present  
79 in tiled BACs, though not completely within individual BAC clones. Neither *Nix* nor the  
80 complete region could be found in the AaegL3 or Aag2 reference genome assemblies. While  
81 *Nix* was originally identified in the genome-sequenced Liverpool strain<sup>5</sup>, PCR revealed that it  
82 is exclusively present in male genomic DNA from other geographically varied *Ae. aegypti*  
83 populations (Figure S1), further strengthening the evidence that it is wholly present in the M  
84 locus.

85 The *Nix* gene was found to be made up of two exons with a single intron of 99 kb (Figure 1).  
86 Although large introns are not uncommon in *Ae. aegypti* (average intron length ~5000 bp)<sup>16</sup>,  
87 this intron is at the extreme end of intron sizes observed (Figure S2), especially considering  
88 the small size of its protein coding regions (<1000 bp). The gene structure is confirmed by  
89 Illumina RNA-Seq data clearly showing reads spanning the intron between the two exons  
90 (Figure 1). RepeatMasker identified approximately 55% of the sequenced region as  
91 repetitive, and the intron region of *Nix* as 72% repetitive (Table S1).

92

93 The genomic data from our assembled M locus region show that *Nix* is approximately 100 kb  
94 in length – exceptionally long even for an insect, and one of the longest in the mosquito  
95 genome. This is particularly unusual because *Nix* is expressed in early embryonic

development, before the onset of the syncytial blastoderm stage 3-4 hours after oviposition<sup>5</sup>, during which time most active genes have very short introns, or lack them entirely. There is evidence of selection against intron presence in genes expressed in the early *Ae. aegypti* zygote<sup>22</sup>. In *Drosophila*, the majority of early-expressed genes have small introns and encode small proteins, suggesting that selection has favoured high transcript turnover during early embryonic development due to the requirement for short cell cycles and rapid division<sup>23</sup>. It might therefore be expected that selection would limit the *Nix* intron's expansion to preserve efficient transcription in the zygote.

One possible explanation is the expansion of repetitive DNA. The RepeatMasker results reveal that the *Nix* region contains a high number of repetitive sequences, especially retrotransposons (Figure 1; Table S1). The M locus has accumulated repeats in between protein-coding DNA in a manner characteristic of a sex chromosome, which are prone to degeneration by Muller's ratchet due to the lack of recombination<sup>24-26</sup>. For instance, repetitive sequences comprise almost the entire *Anopheles gambiae* Y chromosome, and these repetitive sequences show rapid evolutionary divergence<sup>27</sup>. Similarly, genes on the *Drosophila* Y chromosome, such as those involved in spermatogenesis, have gigantic repetitive introns, sometimes in the megabase range, that consequently make them many times larger than typical autosomal genes<sup>28,29</sup>.

It is therefore possible that the lack of recombination may pose constraints on the structure of the M locus, and in the absence of strong selection the *Nix* gene has degenerated outside the coding regions. Non-recombining sex loci such as the *Ae. aegypti* M locus may represent an evolutionary precursor to differentiated sex chromosomes, which are thought to emerge when sexually antagonistic alleles accumulate on either chromosome and favour reduced recombination between the two homologs, eventually leading to degeneration and loss of genes on the proto-Y<sup>30</sup>. Recent data appears to show that recombination is reduced along

autosome 1 even outside of the M locus<sup>31</sup>, while the fully differentiated *Anopheles* X and Y chromosomes still display some degree of recombination with each other<sup>27</sup>. Thus, *Ae. aegypti* may be “further along” this evolutionary trajectory than previously assumed. The *Ae. aegypti* M locus provides an intriguing example of the complexity of evolutionary forces acting on sex chromosomes, and further study of the locus will contribute to understanding the evolution of sex determination in insects and address general questions about the factors impacting gene and genome length. Importantly, these may also yield insights that can be applied to increase the efficiency of genetic strategies for vector control.

## Methods

### BAC library construction

A BAC library of insert size 130 kb was constructed (Amplicon Express, USA) for an estimated coverage of ~5x for autosomal regions (~2.5x for sex specific regions) from a DNA pool of approximately 50 sibling males. The male siblings were from one family from an Asian wild type laboratory strain after five generations of full-sib mating. Superpools and matrixpools were supplied to allow PCR based screening of the BAC library.

### BAC library screening, isolation and sequencing

The BAC library was PCR screened using primers (Nix1F 3'-TTGAGTCTGAAAAGTCTATGCAA-5', Nix1R 3'-TCGCTCTTCCGTGGCATTGA-5', Nix2F 3'-ACGTAGTCGGCAACTCGAAG-5', Nix2R 3'-CTGGGACAAATCGAACGGAA-5') based on the complete coding sequence of *Nix* (GenBank accession number KF732822). The first primer set was also used to screen for *Nix* in the genomic DNA of six male and six female individuals each from two wildtype *Ae. aegypti* strains.

Screening of the library resulted in four positive clones - two for each primer pair. These BAC clones were propagated, extracted using a Maxiprep kit (Qiagen, UK), pooled before SMRTbell library preparation (PacBio, USA), and sequenced on a single SMRTcell using P6-C3 chemistry on the PacBio RS II platform (PacBio, USA).

# **Data analysis**

The sequence data was trimmed to remove vector sequences and adaptors prior to assembly with the CANU v1 assembler<sup>32</sup>, followed by sequence polishing with QUIVER. BLASTN was used to assess the uniqueness of the assembled *Nix* region compared to the *Aedes aegypti* Liverpool reference genome AaegL3 and the newer Aag2 cell line assembly. Illumina data generated from male and female genomic DNA (accession numbers SRX290472 and SRX290470) and RNA (accession numbers SRX709698-SRX709703) were mapped to a combined reference containing the assembled *Nix* region added to the AaegL3 genome. DNA samples were mapped with BOWTIE 2.2.1 (using default parameters with -I 200 and -X 500) and RNA-Seq data with TOPHAT 2.1.1 version (using default parameters). RNA-Seq data was processed using the CUFFLINKS 2.2.1 pipeline to look for potential genes and male/female specific expression from the region. Genes were predicted using AUGUSTUS and the *Aedes aegypti* model<sup>16</sup>, repetitive regions described using REPEATMASKER 4.0.6 and the *Ae. aegypti* repeat database.

**Supplementary Information** is available in the online version of the paper.

# **Author contributions**

J.T., R.K. and A.E.v.H. contributed equally to this work. K.M. and A.C.D. designed the study and obtained funding, with contribution from J.T.; K.M. provided mosquito samples; E.R.S. and A.C.D. commissioned the BAC library construction; A. E. v. H. and J. T. screened the

BAC library and extracted DNA; A. E. v. H. performed BAC scaffolding; A.C.D. oversaw sequencing and assembled the DNA sequence; R.K. performed the mapping and developed computational strategies for data analysis; J.T. performed the repeat masking; J.T. and A.C.D. wrote the paper, with contribution from A. E. v. H.; R.K. and A.C.D. produced the figures.

## Acknowledgments

This work was funded by BBSRC PhD training grant BB/M503460/1 (J.T. & A.C.D.) and a BBSRC grant BB/M001512/1 (K.M. & A.C.D.).

The PacBio sequencing was conducted at the Centre for Genomics Research, University of Liverpool with the assistance of Dr Margaret Hughes and Dr John Kenny.

We thank Dr Andrea Betancourt and Dr Ilik Saccheri for comments on the manuscript.

## References

1. Alphey, L. Genetic control of mosquitoes. *Annu. Rev. Entomol.* **59**, 205–224 (2014).
2. Gilles, J. R. L. *et al.* Towards mosquito sterile insect technique programmes: exploring genetic, molecular, mechanical and behavioural methods of sex separation in mosquitoes. *Acta Trop.* **132**, S178-187 (2014).
3. Adelman, Z. N. & Tu, Z. Control of mosquito-borne infectious diseases: sex and gene drive. *Trends Parasitol.* **32**, 219–229 (2016).
4. Craig, G. B., Hickey, W. A. & Vandehey, R. C. An inherited male-producing factor in *Aedes aegypti*. *Science* **132**, 1887–1889 (1960).
5. Hall, A. B. *et al.* A male-determining factor in the mosquito *Aedes aegypti*. *Science* **348**, 1268–70 (2015).
6. Laughlin, C. A. *et al.* Dengue research opportunities in the Americas. *J. Infect. Dis.*



- 195           **206**, 1121–1127 (2012).
- 196    7.    Bhatt, S. *et al.* The global distribution and burden of dengue. *Nature* **496**, 504–507
- 197           (2013).
- 198    8.    Musso, D., Cao-Lormeau, V. M. & Gubler, D. J. Zika virus: following the path of
- 199           dengue and chikungunya? *Lancet* **386**, 243–244 (2015).
- 200    9.    Fauci, A. S. & Morens, D. M. Zika Virus in the Americas — Yet Another Arbovirus
- 201           Threat. *N. Engl. J. Med.* **374**, 601–604 (2016).
- 202    10.   Alphey, L. *et al.* Genetic control of *Aedes* mosquitoes. *Pathog. Glob. Health* **107**, 170–
- 203           179 (2013).
- 204    11.   Hoang, K. P., Teo, T. M., Ho, T. X. & Le, V. S. Mechanisms of sex determination and
- 205           transmission ratio distortion in *Aedes aegypti*. *Parasit. Vectors* **9**, 49 (2016).
- 206    12.   Charlesworth, D. & Mank, J. E. The birds and the bees and the flowers and the trees:
- 207           Lessons from genetic mapping of sex determination in plants and animals. *Genetics*
- 208           **186**, 9–31 (2010).
- 209    13.   Clements, A. N. *The Biology of Mosquitoes*. (Chapman & Hall, 1992).
- 210    14.   Newton, M. E., Wood, R. J. & Southern, D. I. Cytological mapping of the M and D
- 211           loci in the mosquito, *Aedes aegypti* (L.). *Genetica* **48**, 137–143 (1978).
- 212    15.   Toups, M. A. & Hahn, M. W. Retrogenes reveal the direction of sex-chromosome
- 213           evolution in mosquitoes. *Genetics* **186**, 763–766 (2010).
- 214    16.   Nene, V. *et al.* Genome sequence of *Aedes aegypti*, a major arbovirus vector. *Science*
- 215           **316**, 1718–1723 (2007).
- 216    17.   Koren, S. & Phillippy, A. M. One chromosome, one contig: complete microbial
- 217           genomes from long-read sequencing and assembly. *Curr. Opin. Microbiol.* **23**, 110–
- 218           120 (2015).
- 219    18.   Severson, D. W. & Behura, S. K. Mosquito genomics: progress and challenges. *Annu.*

- 220       *Rev. Entomol.* **57**, 143–166 (2012).
- 221   19.   Hall, A. B. *et al.* Insights into the preservation of the homomorphic sex-determining  
222       chromosome of *Aedes aegypti* from the discovery of a male-biased gene tightly linked  
223       to the M-locus. *Genome Biol. Evol.* **6**, 179–191 (2014).
- 224   20.   Matthews, B. J., McBride, C. S., DeGennaro, M., Despo, O. & Vosshall, L. B. The  
225       neurotranscriptome of the *Aedes aegypti* mosquito. *BMC Genomics* **17**, 32 (2016).
- 226   21.   Chen, X.-G. *et al.* Genome sequence of the Asian Tiger mosquito, *Aedes albopictus* ,  
227       reveals insights into its biology, genetics, and evolution. *Proc. Natl. Acad. Sci.*  
228       201516410 (2015). doi:10.1073/pnas.1516410112
- 229   22.   Biedler, J. K., Hu, W., Tae, H. & Tu, Z. Identification of early zygotic genes in the  
230       yellow fever mosquito *Aedes aegypti* and discovery of a motif involved in early  
231       zygotic genome activation. *PLoS One* **7**, e33933 (2012).
- 232   23.   Artieri, C. G. & Fraser, H. B. Transcript length mediates developmental timing of gene  
233       expression across *Drosophila*. *Mol. Biol. Evol.* **31**, 2879–2889 (2014).
- 234   24.   Muller, H. J. The relation of recombination to mutational advance. *Mutat. Res.* **1**, 2–9  
235       (1964).
- 236   25.   Charlesworth, B. Evolution of sex chromosomes. *Science* **251**, 1030–1033 (1991).
- 237   26.   Kaiser, V. B. & Bachtrog, D. Evolution of sex chromosomes in insects. *Annu. Rev.*  
238       *Genet.* **44**, 91–112 (2010).
- 239   27.   Hall, A. B. *et al.* Radical remodeling of the Y chromosome in a recent radiation of  
240       malaria mosquitoes. *Proc. Natl. Acad. Sci.* **113**, 201525164 (2016).
- 241   28.   Bachtrog, D. Y-chromosome evolution: emerging insights into processes of Y-  
242       chromosome degeneration. *Nat. Rev. Genet.* **14**, 113–124 (2013).
- 243   29.   Carvalho, A. B., Dobo, B. A., Vibranovski, M. D. & Clark, A. G. Identification of five  
244       new genes on the Y chromosome of *Drosophila melanogaster*. *Proc. Natl. Acad. Sci.*

- 245            *USA* **98**, 13225–13230 (2001).
- 246    30.    Charlesworth, D., Charlesworth, B. & Marais, G. Steps in the evolution of
- 247            heteromorphic sex chromosomes. *Heredity (Edinb)*. **95**, 118–128 (2005).
- 248    31.    Fontaine, A. *et al.* Cryptic genetic differentiation of the sex-determining chromosome
- 249            in the mosquito *Aedes aegypti*. *bioRxiv* (2016). doi:<http://dx.doi.org/10.1101/060061>
- 250    32.    Berlin, K. *et al.* Assembling large genomes with single-molecule sequencing and
- 251            locality-sensitive hashing. *Nat. Biotechnol.* **33**, 623–630 (2015).

252

253

254    **Figure legend:**

255    **Figure 1: Structure and gene expression of the ~207 kb genomic region containing the**

256    ***Nix* gene.** *Nix* is shown as two black boxes representing the exons, joined by a black line

257    representing the intron. Colours on the central track of **A** represent the classes of repetitive

258    elements (orange: DNA transposons; cyan: Gypsy LTRs; green: Ty1/Copia LTRs). Blue

259    histograms represent the coverage of RNA-Seq reads from male samples on the y axis; red

260    histograms represent the coverage from female samples. **B** and **C** show enlargements of the

261    first and second exons of *Nix* in the dotted regions in **A**, respectively.

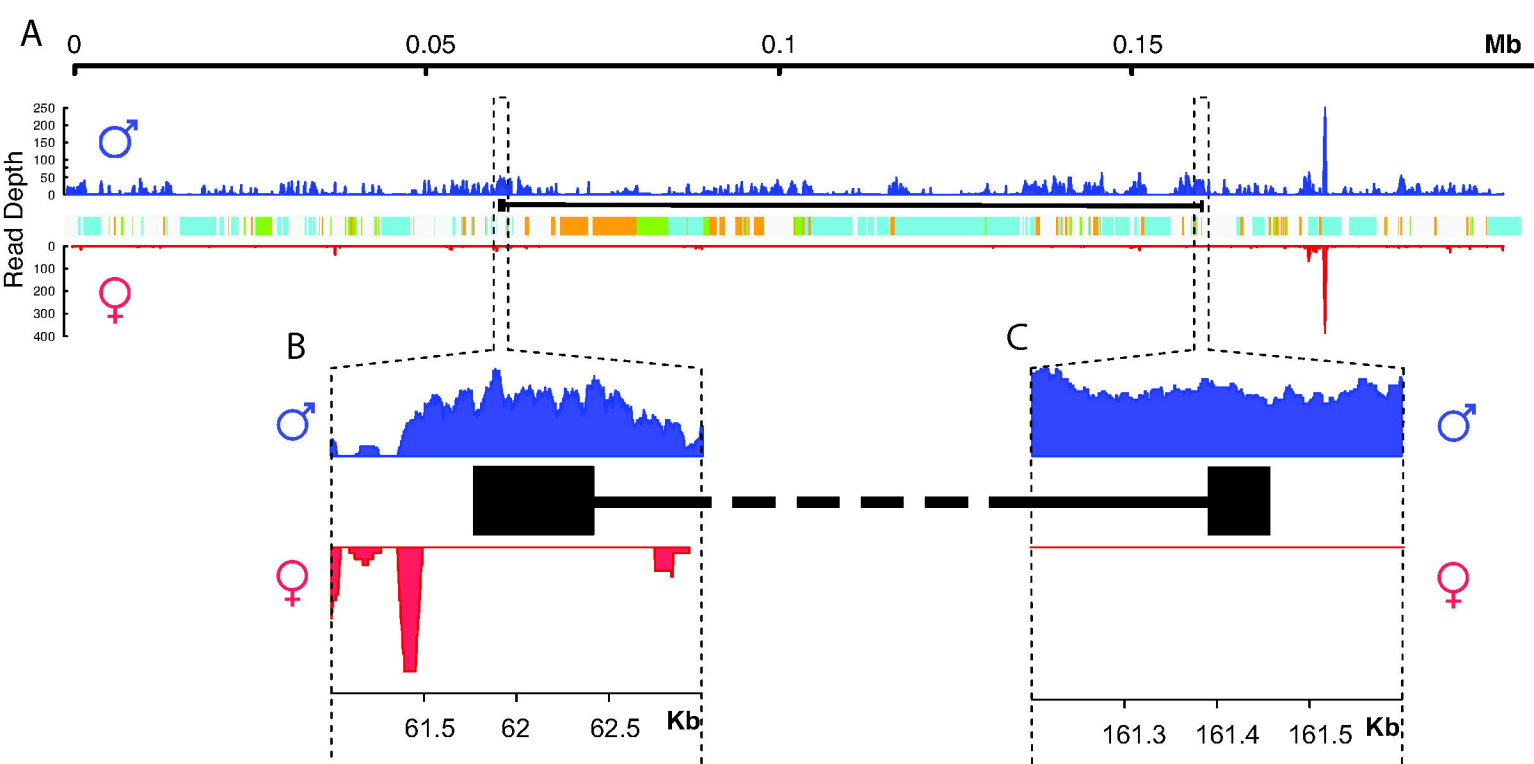

Source: http://biorxiv.org/content/10.1101/122804v1.full.pdf
